# Supplementary material
Source: MDPI journal article supplement (https://www.mdpi.com/2071-1050/9/6/1001)
Supplement: s1 [file s1]

**Table S1. The list of urban renewal polices in Shenzhen (2004–2016).**

| No. | Year | Urban Renewal Polices                                                                                                                                                                                                           | Types            |
|-----|------|---------------------------------------------------------------------------------------------------------------------------------------------------------------------------------------------------------------------------------|------------------|
| 1   | 2004 | Provisional regulation for the renewal of Urban village(old village)in Shenzhen (Decree No.177, 2004, Shenzhen Municipal Government)                                                                                            | Specific         |
| 2   | 2005 | Suggestions on the implementation of provisional regulation for the renewal of urban village (old village)in Shenzhen (Decree No.56, 2005, Shenzhen Municipal Government)                                                       | Specific         |
| 3   | 2005 | Overall plan's outline of urban village (2005-2010) in Shenzhen                                                                                                                                                                 | Specific         |
| 4   | 2006 | Suggestions on promoting renewal of urban village (old village) in Baoan District and Longgang District(Decree No.257, 2006, Shenzhen Municipal Government)                                                                     | Specific         |
| 5   | 2006 | Technical regulations for compiling of specific renewal planning in urban village (Trial) (Decree No.43, 2006, Urban Planning, Land & Resources Commission of the Shenzhen Municipality)                                        | Specific         |
| 6   | 2006 | Notices for 70 old towns or old villages including Xi'an industrial park implemented spontaneously in Baoan District and Longgang District (Decree No.258, 2006, Shenzhen Municipal Government)                                 | Specific         |
| 7   | 2007 | Provisional measures for funds management on supporting the renewal of urban village (old village) (Decree No.24, 2007, Shenzhen Municipal Government)                                                                          | Specific         |
| 8   | 2007 | Suggestions for upgrading and renewal of old industrial parks in Shenzhen (Decree No.75, 2007, Shenzhen Municipal Government)                                                                                                   | Specific         |
| 9   | 2007 | Notices on implementing the renewal of urban village (old village) (Decree No.159, 2007, Shenzhen Municipal Government)                                                                                                         | Specific         |
| 10  | 2007 | Overall plan's outline of upgrading and renewal of old industrial parks in Shenzhen (2007-2020)                                                                                                                                 | Specific         |
| 11  | 2008 | Suggestions of implementing pilot projects for upgrading and renewing old industrial parks (Decree No.35, 2008, Shenzhen Municipal Government)                                                                                  | Specific         |
| 12  | 2008 | Notices for implementing overall renewal projects in Baoan District and Longgang District(Decree No.25, 2008, Shenzhen Municipal Government)                                                                                    | Specific         |
| 13  | 2008 | Notices of announcing publicly and seeking opinions for specific renewal planning of urban villages(Decree No.4, 2008, Shenzhen Municipal Government)                                                                           | Specific         |
| 14  | 2008 | Programs for accelerating to promote upgrading and renewal of old industrial parks(Decree No.93, 2008, Shenzhen Municipal Government)                                                                                           | Specific         |
| 15  | 2009 | Urban renewal measures of Shenzhen Municipality (Decree No.211, 2009, Shenzhen Municipal Government)                                                                                                                            | Multidimensional |
| 16  | 2010 | Notice on provisional basic operational procedures of demolition and reconstruction's urban renewal projects (Decree No.59, 2010, Urban Planning, Land & Resources Commission of the Shenzhen Municipality)                     | Specific         |
| 17  | 2010 | Recommendations of the Shenzhen Municipality on further advancing urban renewal work(Decree No.193, 2010, Shenzhen Municipal Government)                                                                                        | Multidimensional |
| 18  | 2010 | Trial operational rules for logoff of property information of demolition and reconstruction's urban renewal projects(Decree No.554, 2010, Shenzhen Municipal Government)                                                        | Specific         |
| 19  | 2010 | Guidance of plan declaration for formulating of urban renewal unit planning (Trial) (Decree No.16, 2010, Urban Planning, Land & Resources Commission of the Shenzhen Municipality)                                              | Specific         |
| 20  | 2010 | Provisional regulations of provided ratio of social housing in urban renewal projects (Decree No.843, 2010, Urban Planning, Land & Resources Commission of the Shenzhen Municipality)                                           | Specific         |
| 21  | 2010 | Programs for accelerating to promote urban renewal under the deployment of Department of Land and Resource in Guangdong Province(Decree No.206, 2010, Urban Planning, Land & Resources Commission of the Shenzhen Municipality) | Specific         |
| 22  | 2010 | Operational measures of approving urban renewal unit planning (Trial).                                                                                                                                                          | Specific         |

|    |      |                                                                                                                                                                                                                                                                                               |                  |
|----|------|-----------------------------------------------------------------------------------------------------------------------------------------------------------------------------------------------------------------------------------------------------------------------------------------------|------------------|
|    |      | (Decree No.706, 2010, Urban Planning, Land & Resources Commission of the Shenzhen Municipality)                                                                                                                                                                                               |                  |
| 23 | 2010 | Measures for determining the scope of old residential villages of demolition and reconnection's urban renewal units in Baoan, Longgang District and Guangming, Pingshan new District (Trial). (Decree No.439, 2010, Urban Planning, Land & Resources Commission of the Shenzhen Municipality) | Specific         |
| 24 | 2010 | Specific planning of urban renewal including old villages, old industrial park and old towns (2010-215)                                                                                                                                                                                       | Specific         |
| 25 | 2011 | Operational measures of examining land use in urban renewal projects (Decree No.22, 2011, Urban Planning, Land & Resources Commission of the Shenzhen Municipality)                                                                                                                           | Specific         |
| 26 | 2012 | Notices of specific actions plans for accelerating urban renewal (Decree No.244, 2011, Urban Planning, Land & Resources Commission of the Shenzhen Municipality)                                                                                                                              | Multidimensional |
| 27 | 2012 | Detailed rules on the implementation of urban renewal measures (Decree No.1, 2012, Shenzhen Municipal Government)                                                                                                                                                                             | Multidimensional |
| 28 | 2012 | Regulations for compiling technology of urban renewal unit planning                                                                                                                                                                                                                           | Specific         |
| 29 | 2012 | Provisional measures of provided social housing in urban renewal projects (Decree No.843, 2010, Urban Planning, Land & Resources Commission of the Shenzhen Municipality)                                                                                                                     | Specific         |
| 30 | 2013 | Provisional regulations of handling historical land-use in urban renewal projects (Decree No.294, 2013, Urban Planning, Land & Resources Commission of the Shenzhen Municipality)                                                                                                             | Specific         |
| 31 | 2013 | Regulations of calculating price of parcel land (Decree No.22, 2013, Urban Planning, Land & Resources Commission of the Shenzhen Municipality)                                                                                                                                                | Specific         |
| 32 | 2013 | Implementing Suggestions for executing the handling measures of vacant land (Decree No.22, 2013, Urban Planning, Land & Resources Commission of the Shenzhen Municipality)                                                                                                                    | Specific         |
| 33 | 2013 | Operational measures for approving urban renewal units planning (Decree No.786, 2013, Urban Planning, Land & Resources Commission of the Shenzhen Municipality)                                                                                                                               | Specific         |
| 34 | 2013 | Operational measures for checking land and building in urban renewal projects and handling historical land-use (Trial) (Decree No.295, 2013, Urban Planning, Land & Resources Commission of the Shenzhen Municipality)                                                                        | Specific         |
| 35 | 2014 | Provisional measures for strengthening and improving urban renewal implementation(Decree No.8, 2014, Shenzhen Municipal Government)                                                                                                                                                           | Multidimensional |
| 36 | 2014 | Notices for improving management system of urban renewal(Decree No.25, 2014, Office of Organization Management of the Shenzhen Municipal Government)                                                                                                                                          | Specific         |
| 37 | 2015 | Notices on launching selected units for experiments in reform for urban renewal in Luohu District. (Decree No.28, 2015, Shenzhen Municipal Government)                                                                                                                                        | Specific         |
| 38 | 2015 | Measures for altering land-use and floor area ratio of land has been transferred and not constructed (Trial) (Decree No.588, 2015, Urban Planning, Land & Resources Commission of the Shenzhen Municipality)                                                                                  | Specific         |
| 39 | 2015 | Technical guidance of examining floor area ratio of urban renewal units planning (Trial)                                                                                                                                                                                                      | Specific         |
| 40 | 2015 | Operational guidance for upgrading and renewal of comprehensive renovation's old industrial park (Trial) (Decree No.515, 2015, Urban Planning, Land & Resources Commission of the Shenzhen Municipality)                                                                                      | Specific         |
| 41 | 2016 | Provisional measures for strengthening and improving urban renewal implementation (Decree No.38, 2016, Shenzhen Municipal Government)                                                                                                                                                         | Multidimensional |

**Table S2. Context Encoding and Pattern-Matching for Specific Clauses of Five Key Urban Renewal Policies.**

| Num.                                                                          | Coding | Summarizing every clause in one sentence                                                                                                                                                                                  | Basic Policy Instruments(X) |   |     |        |    |    |             | Urban Renewal Activity Process(Y) |     |     |    | Urban Renewal Activity Domain (Z) |    |    |    |
|-------------------------------------------------------------------------------|--------|---------------------------------------------------------------------------------------------------------------------------------------------------------------------------------------------------------------------------|-----------------------------|---|-----|--------|----|----|-------------|-----------------------------------|-----|-----|----|-----------------------------------|----|----|----|
|                                                                               |        |                                                                                                                                                                                                                           | Supply                      |   |     | Demand |    |    | Environment |                                   | RPr | RPI | CI | PE                                | CR | FR | DR |
|                                                                               |        |                                                                                                                                                                                                                           | TIS                         | E | PCI | GP     | MC | FS | LR          | SM                                |     |     |    |                                   |    |    |    |
| <b>Urban renewal measures of Shenzhen Municipality' (Decree No.211, 2009)</b> |        |                                                                                                                                                                                                                           |                             |   |     |        |    |    |             |                                   |     |     |    |                                   |    |    |    |
| 1                                                                             | 1-1-1  | Determining the goals of this urban renewal measures                                                                                                                                                                      |                             |   |     |        |    |    |             | ▼                                 | ▼   | ▼   |    |                                   |    | ▼  |    |
| 2                                                                             | 1-1-2  | Defining the scope of urban renewal activities in municipal area                                                                                                                                                          |                             |   |     |        |    |    | ▼           | ▼                                 | ▼   |     |    |                                   |    | ▼  |    |
| 3                                                                             | 1-1-3  | Urban renewal should follow five principles of implementing urban renewal                                                                                                                                                 |                             |   |     |        |    |    |             | ▼                                 | ▼   | ▼   |    |                                   |    | ▼  |    |
| 4                                                                             | 1-1-4  | Urban renewal should conform urban planning and land-use planning, and also should implement urban renewal unit planning and annual program                                                                               |                             |   |     |        |    |    | ▼           |                                   |     | ▼   |    |                                   |    | ▼  |    |
| 5                                                                             | 1-1-5  | General requirement of implementing subjects of urban renewal                                                                                                                                                             |                             |   |     |        |    |    | ▼           |                                   | ▼   |     |    |                                   |    | ▼  |    |
| 6                                                                             | 1-1-6  | The governments shall guarantee the expenses in implementation of urban renewal, and provide appropriate financial support.                                                                                               |                             |   | ▼   |        |    |    |             |                                   | ▼   |     |    |                                   |    | ▼  |    |
| 7                                                                             | 1-1-7  | Duties of municipal planning and land department referring to urban renewal                                                                                                                                               |                             |   |     |        |    |    | ▼           |                                   | ▼   |     |    |                                   |    | ▼  |    |
| 8                                                                             | 1-1-8  | Division work of related government department referring to urban renewal                                                                                                                                                 |                             |   |     |        |    |    | ▼           |                                   | ▼   |     |    |                                   |    | ▼  |    |
| 9                                                                             | 1-2-1  | Involved major contents of citywide of urban renewal planning                                                                                                                                                             |                             |   |     |        |    |    |             | ▼                                 |     | ▼   |    |                                   |    | ▼  |    |
| 10                                                                            | 1-2-2  | The provisions of urban renewal in the statutory plans                                                                                                                                                                    |                             |   |     |        |    |    | ▼           |                                   |     | ▼   |    |                                   |    | ▼  |    |
| 11                                                                            | 1-2-3  | Urban renewal unit planning                                                                                                                                                                                               |                             |   |     |        |    |    | ▼           |                                   |     | ▼   |    |                                   |    | ▼  |    |
| 12                                                                            | 1-2-4  | Urban renewal unit planning shall include concrete contents including infrastructure construction, design strategy, industrial upgrading and so on.                                                                       |                             |   |     |        |    |    | ▼           |                                   |     | ▼   |    |                                   |    | ▼  |    |
| 13                                                                            | 1-2-5  | The urban renewal unit planning should be developed according to various control requirements identified in the statutory plans, and shall be implemented upon the approval of the municipal planning and land department |                             |   |     |        |    |    | ▼           |                                   |     | ▼   |    |                                   |    | ▼  |    |
| 14                                                                            | 1-2-6  | The annual urban renewal plan shall include the concrete contents.                                                                                                                                                        |                             |   |     |        |    |    |             | ▼                                 |     | ▼   |    |                                   | ▼  |    |    |
| 15                                                                            | 1-2-7  | The district governments may organize the relevant departments to select the urban renewal projects in the area                                                                                                           |                             |   |     |        |    |    |             | ▼                                 |     | ▼   |    |                                   | ▼  |    |    |
| 16                                                                            | 1-2-8  | Clarifying the procedures that how the urban built-up areas are incorporated into urban renewal unit planning                                                                                                             |                             |   |     |        |    |    | ▼           |                                   |     | ▼   |    |                                   |    | ▼  |    |
| 17                                                                            | 1-2-9  | Related duties of The municipal planning and land department in urban renewal                                                                                                                                             |                             |   |     |        |    |    | ▼           |                                   | ▼   |     |    |                                   |    |    |    |
| 18                                                                            | 1-2-10 | Separated procedures of urban renewal unit planning submitted by the district governments or relevant departments of municipal government                                                                                 |                             |   |     |        |    |    | ▼           |                                   | ▼   |     |    |                                   |    | ▼  |    |
| 19                                                                            | 1-3-1  | Definition for urban renewal projects of comprehensive renovation                                                                                                                                                         |                             |   |     |        |    |    | ▼           |                                   | ▼   |     |    |                                   | ▼  | ▼  |    |
| 20                                                                            | 1-3-2  | Relevant technical specifications for urban renewal of comprehensive renovation                                                                                                                                           |                             |   |     |        |    |    | ▼           |                                   | ▼   |     |    |                                   | ▼  |    |    |
| 21                                                                            | 1-3-3  | The implementation scheme of the renewal projects of comprehensive renovation shall be carried out by the local district governments.                                                                                     |                             |   |     |        |    |    | ▼           |                                   | ▼   |     |    |                                   | ▼  |    |    |
| 22                                                                            | 1-3-4  | The expenses of the renewal projects of comprehensive renovation shall be jointly borne by the local district government, the proprietor or other related people.                                                         |                             |   |     |        |    |    | ▼           |                                   | ▼   |     |    |                                   | ▼  |    |    |
| 23                                                                            | 1-4-1  | Definition for urban renewal projects of functional renovation                                                                                                                                                            |                             |   |     |        |    |    | ▼           |                                   |     | ▼   |    |                                   |    | ▼  |    |
| 24                                                                            | 1-4-2  | The renewal projects of functional renovation shall conform to the industrial layout planning                                                                                                                             |                             |   |     |        |    |    |             | ▼                                 |     | ▼   |    |                                   |    | ▼  |    |
| 25                                                                            | 1-4-3  | The concrete procedures for the urban renewal projects of functional renovation                                                                                                                                           |                             |   |     |        |    |    | ▼           |                                   | ▼   |     |    |                                   |    | ▼  |    |
| 26                                                                            | 1-4-4  | Signing the grant contract of land use right in implementing urban renewal of functional renovation.                                                                                                                      |                             |   |     |        |    |    | ▼           |                                   | ▼   |     |    |                                   |    | ▼  |    |
| 27                                                                            | 1-4-5  | The determination of premium that has to be paid for the renewal projects of functional renovation                                                                                                                        |                             |   |     |        |    |    | ▼           |                                   | ▼   |     |    |                                   |    | ▼  |    |
| 28                                                                            | 1-5-1  | The renewal project of demolition and reconstruction shall follow annual program and unit planning                                                                                                                        |                             |   |     |        |    |    | ▼           |                                   | ▼   |     |    |                                   |    | ▼  |    |
| 29                                                                            | 1-5-2  | The municipal planning and land department shall take back land use rights with compensation under certain conditions.                                                                                                    |                             |   | ▼   |        |    |    |             |                                   |     | ▼   |    |                                   | ▼  |    |    |
| 30                                                                            | 1-5-3  | the municipal government can organize the acquisition of the land use rights                                                                                                                                              |                             |   |     |        |    |    | ▼           |                                   | ▼   |     |    |                                   |    | ▼  |    |
| 31                                                                            | 1-5-4  | Introduce the enterprises into implementation of the urban renewal through tender of demolition or land use right bidding, auction                                                                                        |                             |   |     |        | ▼  |    |             |                                   |     | ▼   |    |                                   |    | ▼  |    |
| 32                                                                            | 1-5-5  | If there is a same subject in urban renewal projects of demolition and reconstruction, the subject can implement demolition in accordance with the present measures.                                                      |                             |   |     |        | ▼  |    |             |                                   | ▼   |     |    |                                   |    | ▼  |    |
| 33                                                                            | 1-5-6  | If there are different subjects in urban renewal projects, it is necessary to make a single subject implement the urban renewal                                                                                           |                             |   |     |        | ▼  |    |             |                                   | ▼   |     |    |                                   |    | ▼  |    |
| 34                                                                            | 1-5-7  | If the buildings on the same piece of land are owned by different owners, they will then constitute a subject of right for all of the owners                                                                              |                             |   |     |        |    |    | ▼           |                                   | ▼   |     |    |                                   |    | ▼  |    |
| 35                                                                            | 1-5-8  | The procedures of obtaining land use rights for implementation subjects in urban renewal of demolition and reconstruction                                                                                                 |                             |   |     |        |    |    | ▼           |                                   |     | ▼   |    |                                   |    | ▼  |    |
| 36                                                                            | 1-5-9  | The premium standards should be paid for urban villages in urban renewal projects of demolition and reconstruction                                                                                                        |                             |   |     |        |    |    | ▼           |                                   |     | ▼   |    |                                   |    | ▼  |    |

|                                                                                                                     |        |                                                                                                                                                                |   |  |  |   |   |  |   |  |   |   |   |   |   |   |
|---------------------------------------------------------------------------------------------------------------------|--------|----------------------------------------------------------------------------------------------------------------------------------------------------------------|---|--|--|---|---|--|---|--|---|---|---|---|---|---|
| 37                                                                                                                  | 1-5-10 | The premium standards should be paid for old tract house                                                                                                       |   |  |  |   |   |  |   |  | ▼ |   |   |   |   | ▼ |
| 38                                                                                                                  | 1-5-11 | The premium standards should be paid for upgrading projects of the demolition and reconstruction in industrial areas                                           |   |  |  |   | ▼ |  |   |  |   |   |   |   |   | ▼ |
| 39                                                                                                                  | 1-5-12 | The premium standards should be paid for other projects of demolition and reconstruction                                                                       |   |  |  |   | ▼ |  |   |  |   |   |   |   |   | ▼ |
| 40                                                                                                                  | 1-5-13 | The proprietor shall deal well with economic relations within the scope of demolition and reconstruction projects.                                             |   |  |  | ▼ |   |  |   |  |   |   |   |   |   | ▼ |
| 41                                                                                                                  | 1-6-1  | The single building that regarded as dilapidated buildings legally shall implement according to the relevant provisions on the dilapidated building management |   |  |  |   |   |  | ▼ |  | ▼ |   |   |   |   | ▼ |
| 42                                                                                                                  | 1-6-2  | determining how the illegal land use and illegal buildings are used as objects of urban renewal                                                                |   |  |  |   |   |  | ▼ |  | ▼ |   |   |   |   | ▼ |
| 43                                                                                                                  | 1-6-3  | Unsold state-owned land include the corner pieces, sandwich pieces shall be used for infrastructure and public service facilities preferentially               |   |  |  |   |   |  | ▼ |  |   | ▼ |   |   |   | ▼ |
| 44                                                                                                                  | 1-6-4  | Urban renewal projects shall preserve historical and cultural relics.                                                                                          |   |  |  |   |   |  | ▼ |  |   | ▼ |   |   | ▼ |   |
| 45                                                                                                                  | 1-6-5  | Urban renewal projects of demolition and reconstruction should meet requirements of affordable housing and industrial housing construction                     |   |  |  |   |   |  | ▼ |  |   | ▼ |   |   |   | ▼ |
| 46                                                                                                                  | 1-6-6  | Industrial land involved urban renewal shall follow Shenzhen industry guide directory                                                                          |   |  |  |   |   |  | ▼ |  | ▼ |   |   |   | ▼ |   |
| 47                                                                                                                  | 1-6-7  | The municipal planning and land department shall determine the contents in the land use right transfer contract.                                               |   |  |  |   |   |  | ▼ |  |   | ▼ |   |   |   | ▼ |
| 48                                                                                                                  | 1-6-8  | The large renewal project can be implemented by stages.                                                                                                        |   |  |  | ▼ |   |  |   |  |   | ▼ |   |   |   | ▼ |
| 49                                                                                                                  | 1-6-9  | the work of energy saving and emission reduction shall be effectively promoted in the process of the implementation of urban renewal                           |   |  |  |   |   |  | ▼ |  |   | ▼ |   |   | ▼ |   |
| 50                                                                                                                  | 1-7-1  | Legal measure for governmental staff violate the law and disciplines in the management of urban renewal.                                                       |   |  |  |   |   |  | ▼ |  | ▼ |   |   |   |   | ▼ |
| <b>Recommendations of the Shenzhen Municipality on further advancing urban renewal work' (Decree No.193, 2010)</b>  |        |                                                                                                                                                                |   |  |  |   |   |  |   |  |   |   |   |   |   |   |
| 51                                                                                                                  | 2-1-1  | Urban renewal may make significant impacts on economic and social development in the long term.                                                                |   |  |  |   |   |  |   |  | ▼ | ▼ |   |   |   | ▼ |
| 52                                                                                                                  | 2-1-2  | Promoting urban renewal deeply is urgent in Shenzhen                                                                                                           |   |  |  |   |   |  |   |  | ▼ | ▼ |   |   |   | ▼ |
| 53                                                                                                                  | 2-1-3  | Urban renewal requires coordination of the whole city to promote                                                                                               |   |  |  |   |   |  |   |  | ▼ | ▼ |   |   |   | ▼ |
| 54                                                                                                                  | 2-2-1  | General requirements of urban renewal in Shenzhen                                                                                                              |   |  |  |   |   |  |   |  | ▼ | ▼ |   |   |   | ▼ |
| 55                                                                                                                  | 2-2-2  | Objectives of urban renewal in Shenzhen                                                                                                                        |   |  |  |   |   |  |   |  | ▼ | ▼ |   |   |   | ▼ |
| 56                                                                                                                  | 2-3-1  | It is essential to implement urban renewal projects in core areas successfully.                                                                                |   |  |  |   |   |  |   |  | ▼ | ▼ |   |   |   | ▼ |
| 57                                                                                                                  | 2-3-2  | Accelerating the disposal of historic legacy of land                                                                                                           |   |  |  |   |   |  | ▼ |  |   | ▼ |   |   |   | ▼ |
| 58                                                                                                                  | 2-3-3  | Exploring the new mechanism of relocation and compensation of urban renewal                                                                                    |   |  |  |   | ▼ |  |   |  |   | ▼ |   |   |   | ▼ |
| 59                                                                                                                  | 2-3-4  | Improving the system of urban renewal unit                                                                                                                     |   |  |  |   |   |  |   |  | ▼ |   | ▼ |   |   | ▼ |
| 60                                                                                                                  | 2-3-5  | Enhancing the efficiency of approval                                                                                                                           | ▼ |  |  |   |   |  |   |  |   |   | ▼ |   |   | ▼ |
| 61                                                                                                                  | 2-3-6  | Improve the urban renewal policy and regulations                                                                                                               |   |  |  |   |   |  | ▼ |  |   | ▼ |   |   |   | ▼ |
| 62                                                                                                                  | 2-4-1  | Guarantee public service land in city                                                                                                                          |   |  |  | ▼ |   |  |   |  |   |   | ▼ |   |   | ▼ |
| 63                                                                                                                  | 2-4-2  | Carry out the differential industrial land policy                                                                                                              |   |  |  | ▼ |   |  |   |  |   |   | ▼ |   | ▼ | ▼ |
| 64                                                                                                                  | 2-4-3  | Guarantee the innovative industrial house                                                                                                                      |   |  |  |   | ▼ |  |   |  |   |   | ▼ |   |   | ▼ |
| 65                                                                                                                  | 2-4-4  | Providing the supportive affordable housing                                                                                                                    |   |  |  | ▼ |   |  |   |  |   |   | ▼ |   |   | ▼ |
| 66                                                                                                                  | 2-4-5  | Promoting the low-carbon renewal and green renewal                                                                                                             |   |  |  |   |   |  |   |  | ▼ |   | ▼ |   | ▼ | ▼ |
| 67                                                                                                                  | 2-4-6  | Guarantee public safety in urban renewal                                                                                                                       |   |  |  |   |   |  |   |  | ▼ |   | ▼ |   |   | ▼ |
| 68                                                                                                                  | 2-5-1  | Strengthen governmental leadership on urban renewal                                                                                                            |   |  |  |   |   |  | ▼ |  |   | ▼ |   |   |   | ▼ |
| 69                                                                                                                  | 2-6-1  | Enlarging the capital guarantee                                                                                                                                |   |  |  |   | ▼ |  |   |  |   | ▼ |   |   |   | ▼ |
| 70                                                                                                                  | 2-6-2  | Establishing the completed system of information disclosure.                                                                                                   | ▼ |  |  |   |   |  |   |  |   |   | ▼ |   |   | ▼ |
| 71                                                                                                                  | 2-6-3  | Improve the performance appraisal and supervision and inspection system                                                                                        |   |  |  |   |   |  |   |  | ▼ |   |   | ▼ |   | ▼ |
| <b>Detailed rules on the implementation of urban renewal measures of Shenzhen Municipality' (Decree No.1, 2012)</b> |        |                                                                                                                                                                |   |  |  |   |   |  |   |  |   |   |   |   |   |   |
| 72                                                                                                                  | 3-1-1  | Purpose of this detailed rules                                                                                                                                 |   |  |  |   |   |  |   |  | ▼ | ▼ |   |   |   | ▼ |
| 73                                                                                                                  | 3-1-2  | The main duties of urban renewal leading group and the municipal planning and land department                                                                  |   |  |  |   |   |  | ▼ |  |   | ▼ |   |   |   | ▼ |
| 74                                                                                                                  | 3-1-3  | The main duties of municipal department and district department                                                                                                |   |  |  |   |   |  | ▼ |  |   | ▼ |   |   |   | ▼ |
| 75                                                                                                                  | 3-1-4  | promoting urban renewal policy propaganda and enhancing guidance for urban renewal                                                                             | ▼ |  |  |   |   |  |   |  |   | ▼ |   |   |   | ▼ |
| 76                                                                                                                  | 3-1-5  | Administrative undertaking fees of urban renewal projects are free of charge.                                                                                  |   |  |  |   |   |  | ▼ |  |   |   | ▼ |   |   | ▼ |
| 77                                                                                                                  | 3-1-6  | Encouraging financial innovations to support urban renewal development                                                                                         |   |  |  |   |   |  | ▼ |  |   |   | ▼ |   |   | ▼ |
| 78                                                                                                                  | 3-1-7  | Urban renewal projects shall follow green energy-saving and low carbon principles in the implementation of urban renewal                                       |   |  |  |   |   |  |   |  | ▼ |   | ▼ |   | ▼ | ▼ |
| 79                                                                                                                  | 3-1-8  | Establishing complaint working system of urban renewal                                                                                                         | ▼ |  |  |   |   |  |   |  |   |   |   | ▼ |   | ▼ |
| 80                                                                                                                  | 3-1-9  | The government shall intensify efforts on investigating and punishment of new illegal construction in urban renewal unit                                       |   |  |  |   |   |  |   |  | ▼ |   |   | ▼ |   | ▼ |
| 81                                                                                                                  | 3-2-1  | The competent department compile specific urban renewal planning according upper planning                                                                      |   |  |  |   |   |  |   |  | ▼ | ▼ |   |   | ▼ | ▼ |
| 82                                                                                                                  | 3-2-2  | The renewal project of demolition and reconstruction shall regards urban renewal unit as basic unit                                                            |   |  |  |   |   |  |   |  | ▼ |   | ▼ |   |   | ▼ |
| 83                                                                                                                  | 3-2-3  | Establishing the concrete standards of urban renewal units                                                                                                     |   |  |  |   |   |  |   |  | ▼ |   | ▼ |   |   | ▼ |
| 84                                                                                                                  | 3-2-4  | Special measures when other land is involved in urban renewal units.                                                                                           |   |  |  |   |   |  |   |  | ▼ |   | ▼ |   |   | ▼ |
| 85                                                                                                                  | 3-2-5  | Requirements that unused land need transfer into urban renewal unit                                                                                            |   |  |  |   |   |  |   |  | ▼ |   | ▼ |   |   | ▼ |
| 86                                                                                                                  | 3-2-6  | The principles of compiling urban renewal unit planning                                                                                                        |   |  |  |   |   |  |   |  | ▼ |   | ▼ |   |   | ▼ |

|     |        |                                                                                                                                                                                                          |   |  |   |  |  |   |   |   |   |   |  |   |   |   |   |
|-----|--------|----------------------------------------------------------------------------------------------------------------------------------------------------------------------------------------------------------|---|--|---|--|--|---|---|---|---|---|--|---|---|---|---|
| 87  | 3-2-7  | The formulation of urban renewal unit planning shall adopt program management.                                                                                                                           |   |  |   |  |  |   |   | ▼ | ▼ |   |  |   | ▼ |   |   |
| 88  | 3-3-1  | The urban renewal projects of comprehensive renovation shall be propelled by municipal, district government in coordination                                                                              |   |  |   |  |  |   |   | ▼ | ▼ |   |  |   | ▼ |   |   |
| 89  | 3-3-2  | Concrete duties of district government and urban management department in implementing urban renewal projects of comprehensive renovation                                                                |   |  | ▼ |  |  |   |   |   | ▼ |   |  |   | ▼ |   |   |
| 90  | 3-3-3  | Concrete procedures in district government for implementing urban renewal projects of comprehensive renovation                                                                                           |   |  | ▼ |  |  |   |   |   | ▼ |   |  |   | ▼ |   |   |
| 91  | 3-3-4  | The city planning and land use department shall approval process of comprehensive retrofit planning                                                                                                      |   |  |   |  |  | ▼ |   |   |   |   |  | ▼ | ▼ |   |   |
| 92  | 3-3-5  | Implementing unit shall apply for permission of comprehensive renovation                                                                                                                                 |   |  |   |  |  |   |   | ▼ | ▼ |   |  |   | ▼ |   |   |
| 93  | 3-3-6  | The specific provision of comprehensive retrofit projects shall be formulated by different municipal departments                                                                                         |   |  |   |  |  |   |   | ▼ | ▼ |   |  |   | ▼ |   |   |
| 94  | 3-4-1  | Rights subject can apply urban renewal projects of function retrofit when necessary. However, urban renewal projects of functional retrofit shall not be implemented when existing certain circumstance. |   |  |   |  |  |   | ▼ |   | ▼ |   |  |   |   | ▼ |   |
| 95  | 3-4-2  | The specific certification of applying for urban renewal projects of functional retrofit                                                                                                                 |   |  |   |  |  |   |   | ▼ | ▼ |   |  |   |   | ▼ |   |
| 96  | 3-4-3  | The competent department shall examine the related planning and other documents.                                                                                                                         | ▼ |  |   |  |  |   |   |   |   | ▼ |  |   |   | ▼ |   |
| 97  | 3-4-4  | After publicity, the competent department shall collect and handle all related suggestion.                                                                                                               | ▼ |  |   |  |  |   |   |   |   | ▼ |  |   |   | ▼ |   |
| 98  | 3-4-5  | After completing related planning and land use procedure, applicant can implement urban renewal of comprehensive renovation                                                                              |   |  |   |  |  |   |   | ▼ |   |   |  | ▼ |   | ▼ |   |
| 99  | 3-4-6  | Related rights subjects shall timely apply for registration of property                                                                                                                                  |   |  |   |  |  |   |   | ▼ | ▼ |   |  |   |   | ▼ |   |
| 100 | 3-4-7  | The premium standard of urban renewal projects of functional retrofit                                                                                                                                    |   |  |   |  |  | ▼ |   |   |   | ▼ |  |   |   | ▼ |   |
| 101 | 3-5-1  | Specific built-up area which is difficult to implement renewal could be renewal by demolition and reconstruction.                                                                                        |   |  |   |  |  |   |   | ▼ | ▼ |   |  |   |   |   | ▼ |
| 102 | 3-5-2  | Specific detailed explanations' standards of establishing urban renewal unit planning                                                                                                                    |   |  | ▼ |  |  |   |   |   |   |   |  | ▼ |   |   | ▼ |
| 103 | 3-5-3  | Single or scattered buildings were identified as the dangerous house will be not included into urban renewal projects of demolition and reconstruction                                                   |   |  |   |  |  |   |   | ▼ |   |   |  | ▼ |   |   | ▼ |
| 104 | 3-5-4  | Four implement method of urban renewal projects of demolition and reconstruction                                                                                                                         |   |  |   |  |  |   |   | ▼ | ▼ |   |  |   |   |   | ▼ |
| 105 | 3-5-5  | As for urban renewal projects of demolition and reconstruction, eligible subject shall submit urban renewal unit program                                                                                 |   |  |   |  |  |   |   | ▼ | ▼ |   |  |   |   |   | ▼ |
| 106 | 3-5-6  | The specific regulations of subjects for urban renewal unit program                                                                                                                                      |   |  |   |  |  |   |   | ▼ | ▼ |   |  |   |   |   | ▼ |
| 107 | 3-5-7  | Applying urban renewal unit program shall follow some certain conditions                                                                                                                                 |   |  |   |  |  |   |   | ▼ |   |   |  | ▼ |   |   | ▼ |
| 108 | 3-5-8  | As for applying urban renewal unit program, rights subjects of urban renewal unit should meet certain requirements.                                                                                      |   |  |   |  |  |   |   | ▼ | ▼ |   |  |   |   |   | ▼ |
| 109 | 3-5-9  | The specific regulations of application materials                                                                                                                                                        |   |  |   |  |  |   |   | ▼ | ▼ |   |  |   |   |   | ▼ |
| 110 | 3-5-10 | The competent authorities shall formulate the draft of urban renewal unit program, and announce to the public                                                                                            | ▼ |  |   |  |  |   |   |   |   |   |  | ▼ |   |   | ▼ |
| 111 | 3-5-11 | The competent authorities shall examine concrete materials and reply by letter to applicants                                                                                                             |   |  |   |  |  |   |   | ▼ | ▼ |   |  |   |   |   | ▼ |
| 112 | 3-5-12 | Applicants shall entrust related eligible professionals to compile urban renewal planning and submit to inspect                                                                                          |   |  |   |  |  |   |   | ▼ | ▼ |   |  |   |   |   | ▼ |
| 113 | 3-5-13 | Competent authorities shall check the application materials in terms of contents and depth                                                                                                               |   |  |   |  |  |   |   | ▼ |   |   |  | ▼ |   |   | ▼ |
| 114 | 3-5-14 | Competent authorities check the application materials according to statutory plan and review the urban renewal planning draft                                                                            |   |  |   |  |  |   |   | ▼ |   |   |  | ▼ |   |   | ▼ |
| 115 | 3-5-15 | After approving urban renewal unit plan, competent authorities shall announce specific planning content to public.                                                                                       |   |  |   |  |  |   |   | ▼ |   |   |  | ▼ |   |   | ▼ |
| 116 | 3-5-16 | After approving urban renewal unit plan, district government shall clarify annual land supply scale                                                                                                      |   |  |   |  |  |   |   | ▼ |   |   |  | ▼ |   |   | ▼ |
| 117 | 3-5-17 | Three approaches that how the various rights subjects shall transfer related entitlement into one single subject.                                                                                        |   |  |   |  |  | ▼ |   |   | ▼ |   |  |   |   |   | ▼ |
| 118 | 3-5-18 | Concrete contents of the protocol of relocation, compensation and resettlement between various subjects                                                                                                  |   |  |   |  |  |   |   | ▼ | ▼ |   |  |   |   |   | ▼ |
| 119 | 3-5-19 | The sign process of protocol of relocation, compensation and resettlement shall conduct notarization by notary public.                                                                                   |   |  |   |  |  |   |   | ▼ | ▼ |   |  |   |   |   | ▼ |
| 120 | 3-5-20 | The single subjects in demolition scope of urban renewal shall apply district government to confirm qualification of subjects.                                                                           |   |  |   |  |  |   |   | ▼ |   |   |  | ▼ |   |   | ▼ |
| 121 | 3-5-21 | District government shall examine related application materials                                                                                                                                          |   |  |   |  |  |   |   | ▼ | ▼ |   |  |   |   |   | ▼ |
| 122 | 3-5-22 | Urban renewal department in district government shall accomplish to handle suggestions in 5 days.                                                                                                        |   |  |   |  |  |   |   | ▼ | ▼ |   |  |   |   |   | ▼ |
| 123 | 3-5-23 | The specific contents of supervision protocol between urban renewal department in district government with implementation subjects                                                                       |   |  |   |  |  | ▼ |   |   | ▼ |   |  |   |   |   | ▼ |
| 124 | 3-5-24 | Materials description of applying for logging register of real estate's authority certificate                                                                                                            |   |  |   |  |  |   |   | ▼ | ▼ |   |  |   |   |   | ▼ |
| 125 | 3-5-25 | Implementation subjects shall apply approval of construction land that determined in urban renewal unit planning to competent authorities                                                                |   |  |   |  |  |   |   | ▼ | ▼ |   |  |   |   |   | ▼ |
| 126 | 3-5-26 | Specific contents should be clarifies within grant contract of land use right in urban renewal                                                                                                           |   |  |   |  |  |   |   | ▼ | ▼ |   |  |   |   |   | ▼ |
| 127 | 3-5-27 | Charge standard of land price in urban renewal projects of demolition and reconstruction                                                                                                                 |   |  |   |  |  | ▼ |   |   |   |   |  | ▼ |   |   | ▼ |
| 128 | 3-5-28 | Charge standard of land price in this circumstance that industrial parks transformed into logistic and R&D projects.                                                                                     |   |  |   |  |  | ▼ |   |   |   |   |  | ▼ |   |   | ▼ |
| 129 | 3-5-29 | The calculation rules of average floor area ratio of multi-use buildings                                                                                                                                 |   |  |   |  |  | ▼ |   |   |   |   |  | ▼ |   |   | ▼ |
| 130 | 3-5-30 | Charge standard of land price in projects involves corner pieces, sandwich pieces and mosaic pieces                                                                                                      |   |  |   |  |  | ▼ |   |   |   |   |  | ▼ |   |   | ▼ |
| 131 | 3-5-31 | The charge standard and sequences of the projects involves urban village, old tract houses, and other land.                                                                                              |   |  |   |  |  | ▼ |   |   |   |   |  | ▼ |   |   | ▼ |

|                                                                                                                 |        |                                                                                                                                                                          |   |  |  |  |  |   |   |  |  |   |   |   |  |  |   |   |
|-----------------------------------------------------------------------------------------------------------------|--------|--------------------------------------------------------------------------------------------------------------------------------------------------------------------------|---|--|--|--|--|---|---|--|--|---|---|---|--|--|---|---|
| 132                                                                                                             | 3-5-32 | Charge standard of land price in urban renewal projects of functional retrofit                                                                                           |   |  |  |  |  |   | ▼ |  |  |   |   | ▼ |  |  | ▼ |   |
| 133                                                                                                             | 3-5-33 | Charge standard of land price in 70 old towns or old villages including Xi'an industrial park implemented spontaneously in Baoan District and Longgang District' in 2006 |   |  |  |  |  |   | ▼ |  |  |   |   | ▼ |  |  |   | ▼ |
| 134                                                                                                             | 3-5-34 | Charge standard of land price in projects involves many blocks                                                                                                           |   |  |  |  |  |   | ▼ |  |  |   |   | ▼ |  |  |   | ▼ |
| 135                                                                                                             | 3-5-35 | Development, utilization and management of underground space in urban renewal projects                                                                                   |   |  |  |  |  | ▼ |   |  |  |   | ▼ |   |  |  |   | ▼ |
| 136                                                                                                             | 3-5-36 | The competent authorities shall seek suggestions from district government in terms of various protocol when target projects apply for pre-sale                           |   |  |  |  |  |   |   |  |  |   | ▼ |   |  |  |   | ▼ |
| 137                                                                                                             | 3-5-37 | Government shall arrange independent land for infrastructure and public service facilities preferentially                                                                |   |  |  |  |  | ▼ |   |  |  |   |   | ▼ |  |  |   | ▼ |
| 138                                                                                                             | 3-5-38 | Housing property shall be registered by taking people who are relocated as obligee.                                                                                      |   |  |  |  |  |   |   |  |  |   | ▼ |   |  |  |   | ▼ |
| 139                                                                                                             | 3-5-39 | Municipal industrial department shall supervise industrial access with relevant department                                                                               |   |  |  |  |  |   | ▼ |  |  |   |   | ▼ |  |  |   | ▼ |
| 140                                                                                                             | 3-5-40 | Urban renewal projects cannot be transferred freely before inspection for completion of projects.                                                                        |   |  |  |  |  |   |   |  |  |   | ▼ |   |  |  |   | ▼ |
| 141                                                                                                             | 3-5-41 | Specific measure that municipal and district government implement urban renewal projects of demolition and reconstruction                                                |   |  |  |  |  |   | ▼ |  |  |   |   | ▼ |  |  |   | ▼ |
| 142                                                                                                             | 3-5-42 | Government shall levy house according to 'state-owned land on the housing levy and compensation ordinance' if need adjust the land use.                                  |   |  |  |  |  |   | ▼ |  |  |   |   | ▼ |  |  |   | ▼ |
| 143                                                                                                             | 3-5-43 | Some approaches can be adopted to levy land and real estate.                                                                                                             |   |  |  |  |  |   | ▼ |  |  |   |   | ▼ |  |  |   | ▼ |
| 144                                                                                                             | 3-5-44 | Market subject can apply to ask government to implement urban renewal projects when arriving certain condition                                                           |   |  |  |  |  |   |   |  |  |   | ▼ |   |  |  |   | ▼ |
| 145                                                                                                             | 3-6-1  | Notice in this detail rule shall announce publicly and seek opinions through live demonstration or website continuously.                                                 | ▼ |  |  |  |  |   |   |  |  |   | ▼ |   |  |  |   | ▼ |
| 146                                                                                                             | 3-6-2  | After bringing urban renewal unit into urban renewal program, market supervise department cannot handle establishment and registration of enterprises in this area       | ▼ |  |  |  |  |   |   |  |  |   | ▼ |   |  |  |   | ▼ |
| 147                                                                                                             | 3-6-3  | If any illegal behavior happened, the district government shall penalize timely with relevant department and command corrections                                         | ▼ |  |  |  |  |   |   |  |  |   | ▼ |   |  |  |   | ▼ |
| <b>Provisional measures for strengthening and improving urban renewal implementation' (Decree No.8, 2014)</b>   |        |                                                                                                                                                                          |   |  |  |  |  |   |   |  |  |   |   |   |  |  |   |   |
| 148                                                                                                             | 4-1-1  | Requirements of legal land area for applying urban renewal units of demolition and reconstruction                                                                        |   |  |  |  |  |   |   |  |  |   | ▼ |   |  |  |   | ▼ |
| 149                                                                                                             | 4-1-2  | The life-span's standard of applying demolition and reconstruction in old residential area and old industrial or commercial area.                                        |   |  |  |  |  |   |   |  |  |   | ▼ |   |  |  |   | ▼ |
| 150                                                                                                             | 4-1-3  | The land signed before June 30, 2007 shall handle according to historic land                                                                                             |   |  |  |  |  |   |   |  |  |   | ▼ |   |  |  |   | ▼ |
| 151                                                                                                             | 4-1-4  | 70 renewal projects of old towns and old villages shall be transferred to implementation subjects through agreement                                                      |   |  |  |  |  |   |   |  |  |   | ▼ |   |  |  |   | ▼ |
| 152                                                                                                             | 4-1-5  | Transferred stated-own industrial or warehouse land before June 30, 2007 can be applied to urban renewal policies                                                        |   |  |  |  |  |   |   |  |  |   | ▼ |   |  |  |   | ▼ |
| 153                                                                                                             | 4-1-6  | Life span standards of residential land, industrial land or modern logistic land                                                                                         |   |  |  |  |  |   |   |  |  |   | ▼ |   |  |  |   | ▼ |
| 154                                                                                                             | 4-1-7  | Explore the disposal methods of community land and state-occupied land                                                                                                   |   |  |  |  |  |   |   |  |  | ▼ |   | ▼ |  |  |   | ▼ |
| 155                                                                                                             | 4-2-1  | Referring to upgrading of old industrial park or industrial urban renewal projects of demolition, its matched facilities are limited for personal use                    |   |  |  |  |  |   | ▼ |  |  |   |   | ▼ |  |  |   | ▼ |
| 156                                                                                                             | 4-2-2  | The premium standard in urban renewal projects involves land for infrastructure and public service facility that sell by original agreement                              |   |  |  |  |  |   | ▼ |  |  |   |   | ▼ |  |  |   | ▼ |
| 157                                                                                                             | 4-2-3  | Referring to the upgrading of old industrial park, the premium is collected by every section                                                                             |   |  |  |  |  |   | ▼ |  |  |   |   | ▼ |  |  |   | ▼ |
| 158                                                                                                             | 4-2-4  | Calculation of current land price shall follow the benchmark land price when approving urban renewal unit planning                                                       |   |  |  |  |  |   | ▼ |  |  |   |   | ▼ |  |  |   | ▼ |
| 159                                                                                                             | 4-2-5  | Urban renewal projects, which refer to calculation as market standard, shall be evaluated through three organizations                                                    |   |  |  |  |  |   |   |  |  |   | ▼ |   |  |  |   | ▼ |
| 160                                                                                                             | 4-2-6  | Total land price of urban renewal projects can be paid in installments with no interest                                                                                  |   |  |  |  |  |   | ▼ |  |  |   |   | ▼ |  |  |   | ▼ |
| 161                                                                                                             | 4-3-1  | Encourage urban renewal of comprehensive renovation and functional retrofit                                                                                              |   |  |  |  |  |   |   |  |  |   | ▼ |   |  |  |   | ▼ |
| 162                                                                                                             | 4-3-2  | Old industrial park, which implement comprehensive renovation, can add more auxiliary public facilities.                                                                 |   |  |  |  |  |   |   |  |  |   | ▼ |   |  |  |   | ▼ |
| 163                                                                                                             | 4-3-3  | Old industrial park, which according with industrial development and urban planning, can add more auxiliary public facilities and operational building area              |   |  |  |  |  |   | ▼ |  |  |   |   | ▼ |  |  |   | ▼ |
| 164                                                                                                             | 4-3-4  | Old industrial parks, which refers to construction of public service facilities and infrastructure, are exempted from administrative fee                                 |   |  |  |  |  |   |   |  |  |   | ▼ |   |  |  |   | ▼ |
| 165                                                                                                             | 4-4-5  | The rules that designating urban renewal unit of small block                                                                                                             |   |  |  |  |  |   |   |  |  |   | ▼ |   |  |  |   | ▼ |
| 166                                                                                                             | 4-4-6  | The demolition conditions of urban renewal unit of small block                                                                                                           |   |  |  |  |  |   |   |  |  |   | ▼ |   |  |  |   | ▼ |
| 167                                                                                                             | 4-4-7  | Application materials of small block's renewal in the stage of program declaration                                                                                       |   |  |  |  |  |   |   |  |  |   | ▼ |   |  |  |   | ▼ |
| 168                                                                                                             | 4-4-8  | Independent land in urban renewal units of small block shall be delivered to the government in free of charge.                                                           |   |  |  |  |  |   |   |  |  |   | ▼ |   |  |  |   | ▼ |
| 169                                                                                                             | 4-5-1  | The competent department shall organize district government to adjust urban renewal program regularly                                                                    |   |  |  |  |  |   |   |  |  |   | ▼ |   |  |  |   | ▼ |
| 170                                                                                                             | 4-5-2  | The implementation of urban renewal projects shall be incorporated into the performance evaluation of municipal government.                                              | ▼ |  |  |  |  |   |   |  |  |   |   |   |  |  |   | ▼ |
| 171                                                                                                             | 4-5-3  | The competent department shall improve the efficiency of approving urban renewal projects                                                                                | ▼ |  |  |  |  |   |   |  |  |   |   | ▼ |  |  |   | ▼ |
| 172                                                                                                             | 4-5-4  | The competent department shall enhance governmental service and summarize experience and problems timely.                                                                | ▼ |  |  |  |  |   |   |  |  |   |   | ▼ |  |  |   | ▼ |
| <b>'Provisional measures for strengthening and improving urban renewal implementation' (Decree No.732,2016)</b> |        |                                                                                                                                                                          |   |  |  |  |  |   |   |  |  |   |   |   |  |  |   |   |

|     |       |                                                                                                                                                    |   |   |   |  |  |   |   |   |   |   |   |  |  |   |   |
|-----|-------|----------------------------------------------------------------------------------------------------------------------------------------------------|---|---|---|--|--|---|---|---|---|---|---|--|--|---|---|
| 173 | 5-1-1 | the 13th Five Year Plan of Urban Renewal in Shenzhen Municipality is regarded as programmatic document                                             |   |   |   |  |  |   |   | ▼ | ▼ |   |   |  |  |   | ▼ |
| 174 | 5-1-2 | The urban renewal's duties of district government                                                                                                  |   |   |   |  |  |   |   | ▼ | ▼ |   |   |  |  | ▼ |   |
| 175 | 5-1-3 | The urban renewal's duties of the municipal planning and land department                                                                           |   |   |   |  |  |   |   | ▼ | ▼ |   |   |  |  | ▼ |   |
| 176 | 5-2-1 | When applying urban renewal program of demolition and reconstruction, legal land area shall more than 60% of area in urban renewal unit.           |   |   |   |  |  | ▼ |   |   | ▼ |   |   |  |  |   | ▼ |
| 177 | 5-2-2 | Life span's requirement of buildings in residential area, industrial or commercial area.                                                           |   |   |   |  |  | ▼ |   |   | ▼ |   |   |  |  |   | ▼ |
| 178 | 5-2-3 | Agglomerative old residential area shall apply to demolish and reconstruct through urban renewal district department                               |   |   | ▼ |  |  |   |   |   | ▼ |   |   |  |  |   | ▼ |
| 179 | 5-2-4 | State-owned sold land before June, 30,2007, can be incorporated into the scope of urban renewal unit                                               |   |   |   |  |  | ▼ |   |   | ▼ |   |   |  |  |   | ▼ |
| 180 | 5-2-5 | The specific rules of designating small block of urban renewal unit                                                                                |   |   |   |  |  |   | ▼ |   | ▼ |   |   |  |  |   | ▼ |
| 181 | 5-3-1 | Explore the development of state-oriented significant urban renewal                                                                                |   |   |   |  |  |   |   | ▼ |   | ▼ |   |  |  |   | ▼ |
| 182 | 5-3-2 | District government organize to compile significant urban renewal unit planning which need be approved by municipal government                     |   |   | ▼ |  |  |   |   |   |   | ▼ |   |  |  |   | ▼ |
| 183 | 5-4-1 | Built-up area that land procedure is not completed and take place before June 30, 2007, shall be handled according to historical land              |   |   |   |  |  |   | ▼ |   |   | ▼ |   |  |  |   | ▼ |
| 184 | 5-4-2 | Original old house in countryside that has been formulated before June 18, 1992 shall employ current urban renewal policy                          |   |   |   |  |  | ▼ |   |   | ▼ |   |   |  |  |   | ▼ |
| 185 | 5-4-3 | 70 old towns and old villages shall be transferred to implementation subjects through agreement                                                    |   |   |   |  |  | ▼ |   |   | ▼ |   |   |  |  |   | ▼ |
| 186 | 5-4-4 | Service life's requirement of residential land or industrial land and modern logistical land in an urban renewal unit.                             |   |   |   |  |  |   | ▼ |   |   | ▼ |   |  |  |   | ▼ |
| 187 | 5-4-5 | Integrate the category of land price standard and simplify the calculation rules of urban renewal projects 'price                                  |   |   |   |  |  | ▼ |   |   |   |   | ▼ |  |  |   | ▼ |
| 188 | 5-4-6 | Urban renewal projects approved before January 8, 2013 shall follow benchmark price standard at approval's day                                     |   |   |   |  |  | ▼ |   |   |   |   | ▼ |  |  |   | ▼ |
| 189 | 5-5-1 | Requirements of the community non-independent public facilities in urban renewal projects                                                          |   |   | ▼ |  |  |   |   |   |   | ▼ |   |  |  |   | ▼ |
| 190 | 5-5-2 | District government shall take over various types of public facilities in urban renewal projects.                                                  |   |   | ▼ |  |  |   |   |   |   | ▼ |   |  |  |   | ▼ |
| 191 | 5-5-3 | Affordable housing can be constructed through urban renewal of old industrial park.                                                                |   |   | ▼ |  |  |   |   |   |   | ▼ |   |  |  |   | ▼ |
| 192 | 5-5-4 | The proportion of talents' housing and affordable housing in urban renewal projects of demolition and construction that involves residential house |   |   | ▼ |  |  |   |   |   |   | ▼ |   |  |  |   | ▼ |
| 193 | 5-5-5 | The proportion of talents' apartment in urban renewal projects of demolition and construction that involves business apartment                     |   |   | ▼ |  |  |   |   |   |   | ▼ |   |  |  |   | ▼ |
| 194 | 5-6-1 | Single parcel of old industrial park can be implement through demolition and reconstruction mainly                                                 |   |   |   |  |  |   |   | ▼ |   | ▼ |   |  |  | ▼ |   |
| 195 | 5-6-2 | Encourage old industrial park to implement through comprehensive renovation model mainly.                                                          |   |   |   |  |  | ▼ |   |   |   | ▼ |   |  |  | ▼ |   |
| 196 | 5-6-3 | Comprehensive renovation projects of old industrial park shall conduct planning and procedure of land use.                                         |   |   |   |  |  | ▼ |   |   |   | ▼ |   |  |  |   | ▼ |
| 197 | 5-7-1 | Referring to operation of real estate, application subjects shall possess qualifications of real estate development.                               |   |   |   |  |  |   | ▼ |   | ▼ |   |   |  |  |   | ▼ |
| 198 | 5-7-2 | Urban renewal department in district government issue the confirmation of subjects, also shall send a copy to market supervision department        |   |   |   |  |  |   | ▼ |   | ▼ |   |   |  |  | ▼ |   |
| 199 | 5-7-3 | Urban renewal projects shall be demolished after signing the supervise protocol between urban renewal department and implementation subjects.      |   |   |   |  |  |   | ▼ |   |   |   | ▼ |  |  |   | ▼ |
| 200 | 5-7-4 | The district governments should regularly clean up the urban renewal plan.                                                                         |   |   |   |  |  |   |   | ▼ | ▼ |   |   |  |  |   | ▼ |
| 201 | 5-7-5 | Urban renewal's duties of municipal planning and land department, district management.                                                             | ▼ |   |   |  |  |   |   |   |   |   |   |  |  | ▼ | ▼ |
| 202 | 5-7-6 | The implementation of urban renewal projects shall be incorporated into the municipal government performance appraisal                             |   | ▼ |   |  |  |   |   |   |   |   |   |  |  | ▼ | ▼ |

Note: TIS-Technical Information Support, E-Education, PCI-Public Capital Investment, GP-Government Procurement, MC-Market Cultivation, FS-Financial Support, LR-Legal regulation, SM-Strategic measures, RPr-Renewal Program, RPI-Renewal Planning, CI-Construction Implementation, PE-Post Evaluation, CR-Comprehensive Renovation, FR-Functional Renovation, DR-Demolition and Reconstruction. The black triangle “▼” represents that a clause belongs to corresponding policy instrument, process or domain.
